# Supplementary material for: miDruglikeness: Subdivisional Drug-Likeness Prediction Models Using Active Ensemble Learning Strategies
Source: MDPI journal article supplement (doi:10.3390/biom13010029), 2022-12-23
Supplement: s1 [file s1]

**Supplemental Information:**

**miDruglikeness: subdivisional drug-likeness prediction models using active ensemble learning strategies**

*Chenjing Cai*<sup>1</sup>, *Haoyu Lin*<sup>2</sup>, *Hongyi Wang*<sup>2</sup>, *Youjun Xu*<sup>3</sup>, *Qi Ouyang*<sup>1,4</sup>, *Luhua Lai*<sup>1,2,5</sup>, *Jianfeng Pei*<sup>1,4\*</sup>

<sup>1</sup>Center for Quantitative Biology, Academy for Advanced Interdisciplinary Studies, Peking University, Beijing, 100871, China

<sup>2</sup>BNLMS, State Key Laboratory for Structural Chemistry of Unstable & Stable Species, College of Chemistry and Molecular Engineering, Peking University, Beijing, 100871, China

<sup>3</sup>Infinite Intelligence Pharma, Beijing 100083, China

<sup>4</sup>The State Key Laboratory for Artificial Microstructures and Mesoscopic Physics, School of Physics, Peking University, Beijing 100871, China

<sup>5</sup>Research Unit of Drug Design Method, Chinese Academy of Medical Sciences (2021RU014), Beijing 100871, China

\*Correspondence: jfpei@pku.edu.cn (J.P.)

### **Interpreting the miDruglikeness models with SHAP:**

Because SHAP cannot directly interpret the GNNs. We first used the trained D-MPNN models to calculate the D-MPNN features of datasets and then concatenated them with RDkit descriptors as input of the feed-forward network with the same config of miDruglikeness models. After training the feed-forward network, we can directly apply the GradientExplainer to get the importance score of D-MPNN features and RDkit features.

### **Balanced data test**

To further test our model, we also built the balanced test data with down sampling to eliminate the effect of imbalance in the test data. The data information is shown in **Table S2**. The active ensemble learning still showed the best performance and obtained above 80% accuracy value in all three tasks. The results are shown in **Figure S6**. The active ensemble learning is a general strategy that can improve model's performance.

### **External test for investigational compounds and drugs in ChEMBL**

We collected the "investigational" and "drug" compounds in ChEMBL. After removing duplicates with training sets and preprocessing, there are only 1802 compounds left. Thus we used it as an external test set to test our market approvability model. The market approvability model obtained a satisfying ACC value of 0.728. The datasets and results are shown in **Table S4** and **Table S5**.

### **Active ensemble learning for bioactivity prediction**

We also tested active ensemble strategies on bioactivity prediction. We collected active compounds and inactive compounds for four targets from ChEMBL. The details of datasets are

showed in **Table S7**. And the active ensemble showed better performance than other ensemble strategies. The results are shown in **Table S3**.

### **The balance ratio in active learning iterations**

We calculated the balance ratio of training data in the active learning iterations and passive learning iterations. The balance ratio is relatively high in the early stage of active learning iterations and the balance ratio decreased at the end stage because the left unlabeled pool is imbalanced (**Figure S7**). However, the balance ratio is still low in the passive learning iterations. This suggested that active learning can keep data balanced to some extent. The balance ratio equation is

$$Balance\ ratio = \frac{N_{minority\ class}}{N_{majority\ class}} \quad (S1)$$

where  $N_{minority\ class}$  is the number of molecules in minority class,  $N_{majority\ class}$  is the number of molecules in majority class.

## The figures and tables:

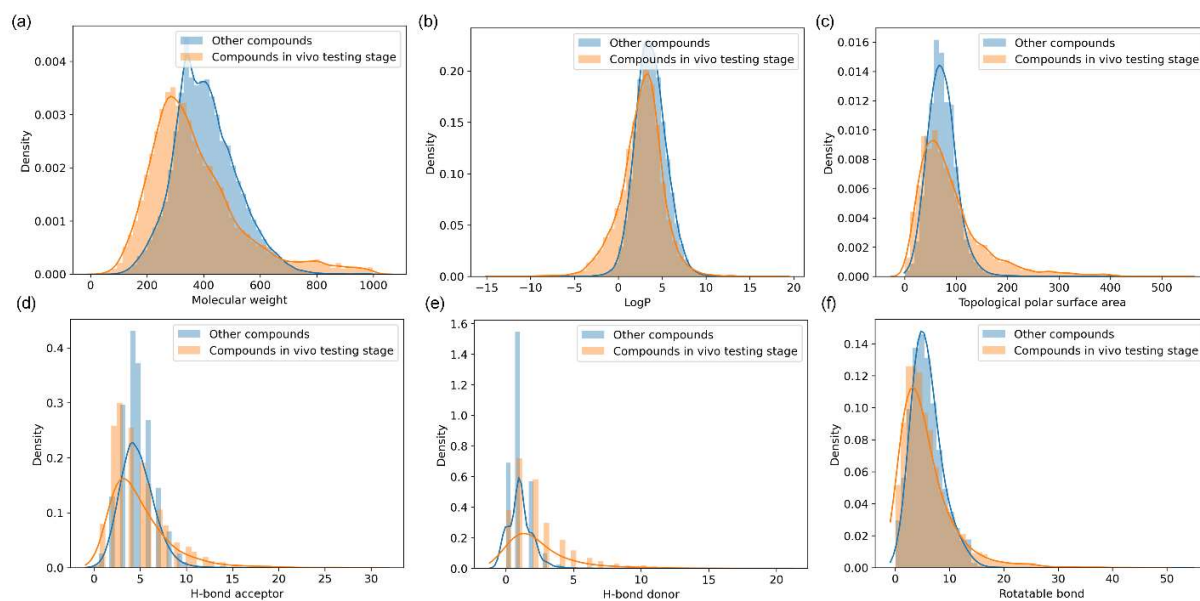

**Figure S1.** The histograms of 6 basic physicochemical properties of *in vivo* ability training sets.

(a) Molecular weight (b) LogP (c) Topological polar surface area (d) H-bond acceptor (e) H-bond donor (d) Rotatable bonds

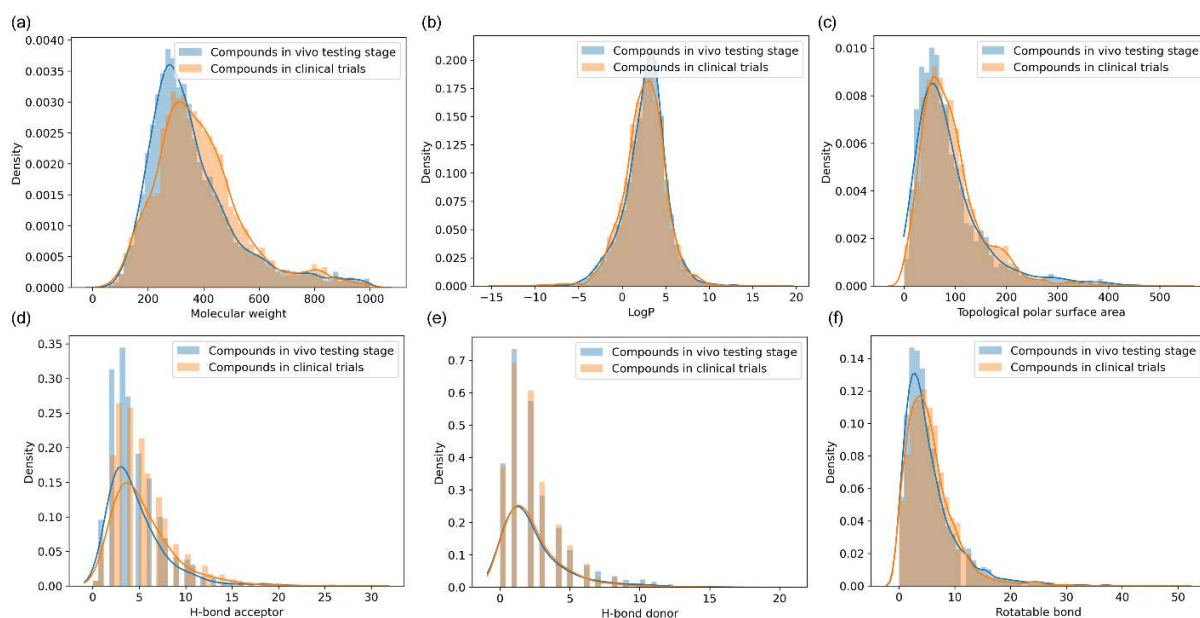

**Figure S2.** The histograms of 6 basic physicochemical properties of IND ability training sets. (a) Molecular weight (b) LogP (c) Topological polar surface area (d) H-bond acceptor (e) H-bond donor (d) Rotatable bonds

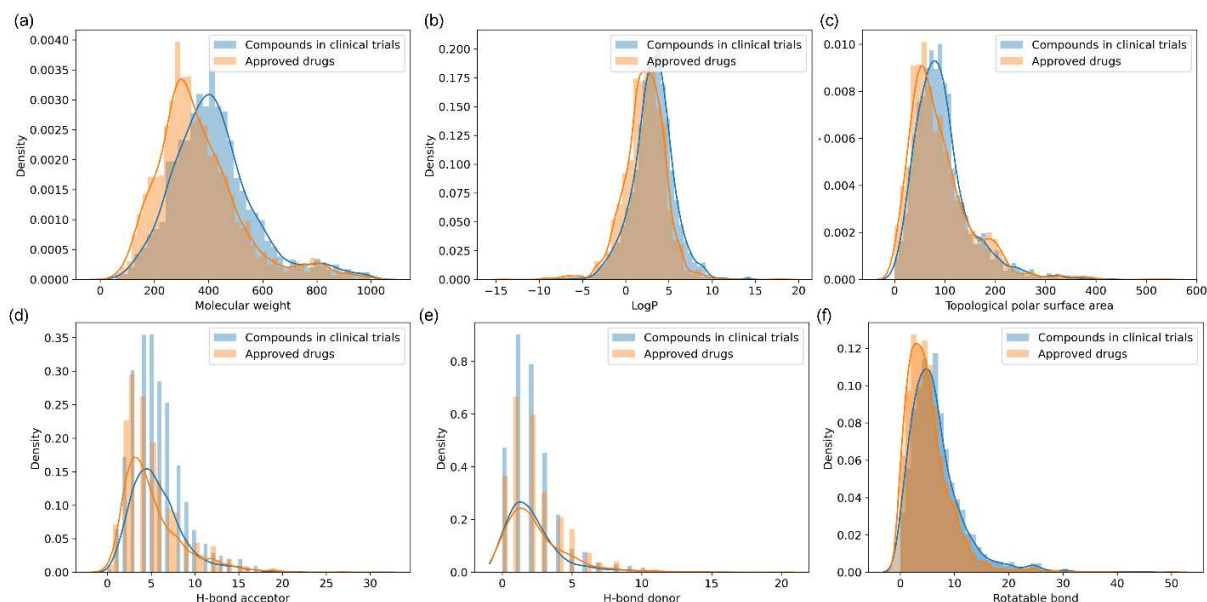

**Figure S3.** The histograms of 6 basic physicochemical properties of market approvability training sets. (a) Molecular weight (b) LogP (c) Topological polar surface area (d) H-bond acceptor (e) H-bond donor (d) Rotatable bonds

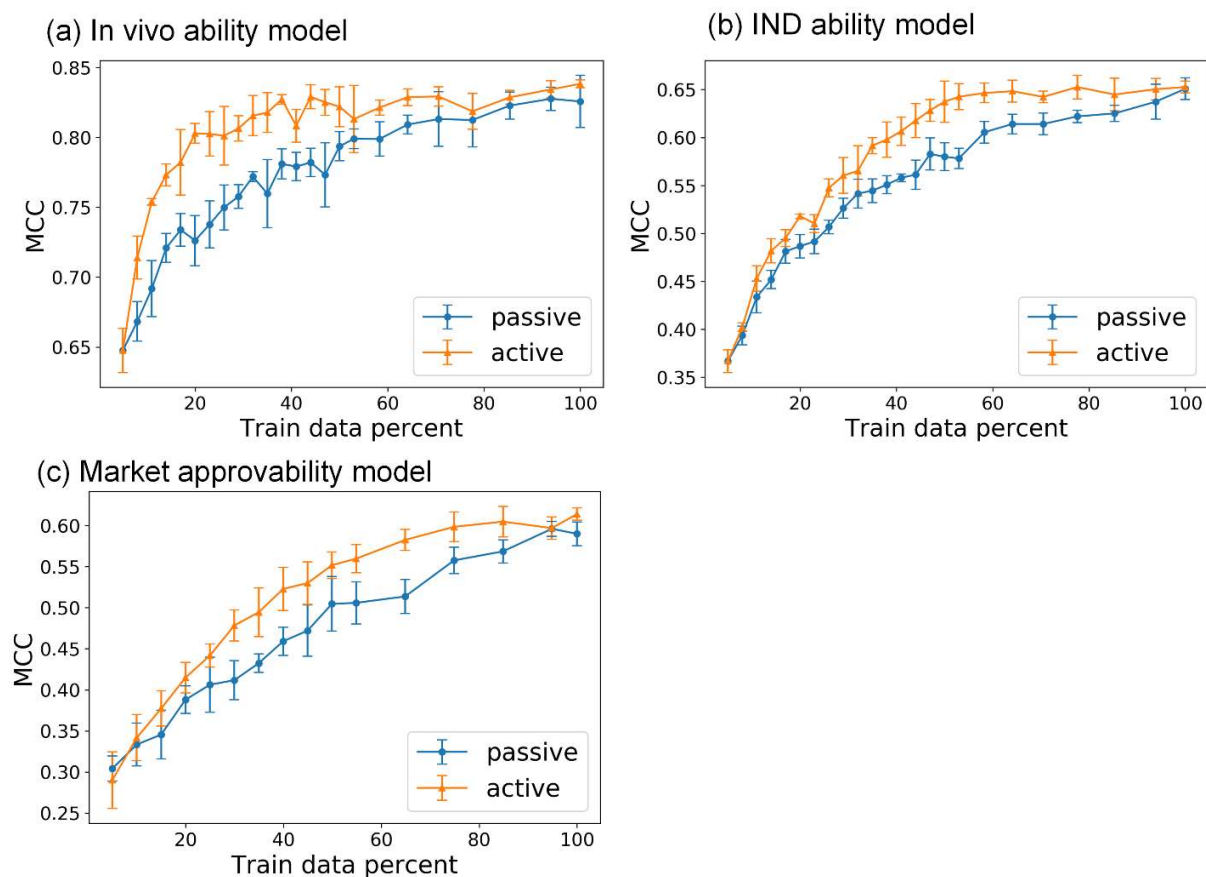

**Figure S4.** The MCC of models in the active learning process on test sets versus the percentage of training data used. (a) *In vivo* ability model (b) IND ability model (c) Market approvability model. The blue lines represent the performance of passive learning models, whereas the orange lines represent the performance of active learning models, and the error bar is the standard deviation of testing results in five-fold training.

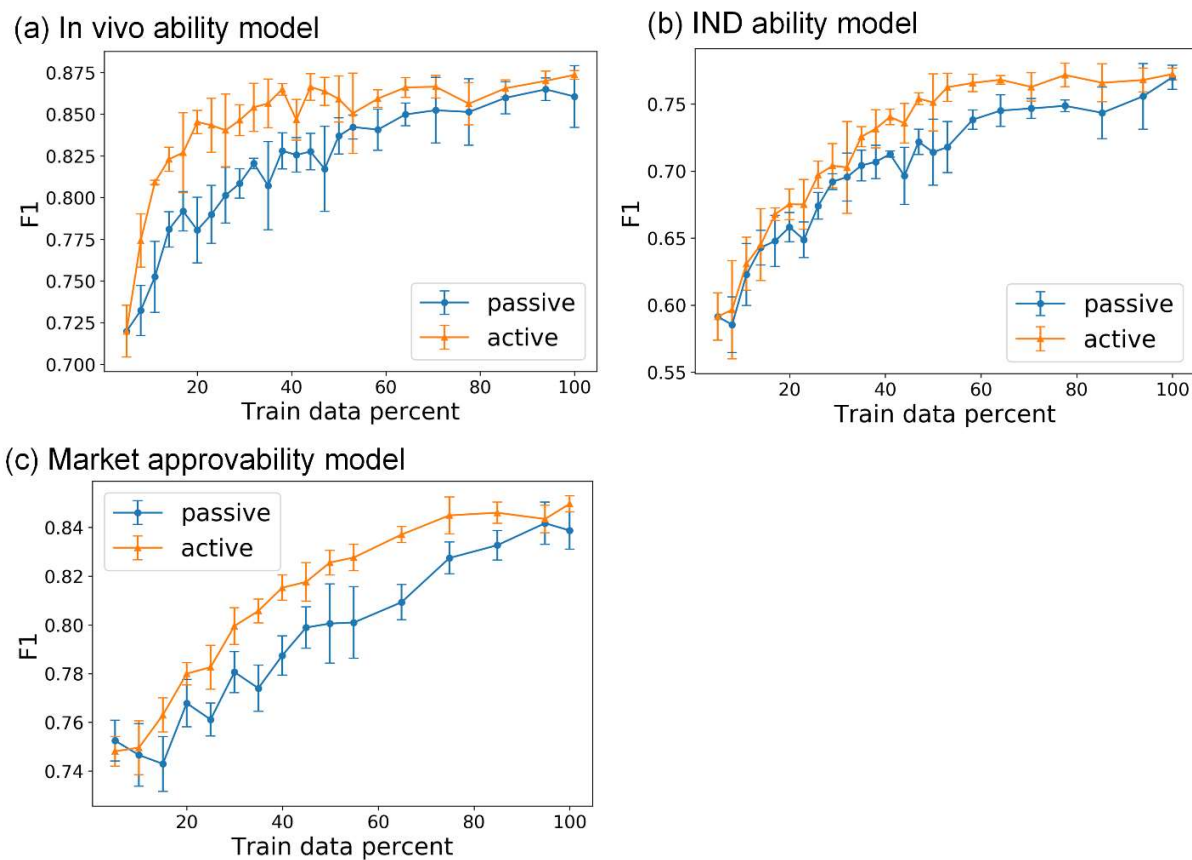

**Figure S5.** The F1 of models in the active learning process on test sets versus the percentage of training data used. (a) *In vivo* ability model (b) IND ability model (c) Market approvability model. The blue lines represent the performance of passive learning models, whereas the orange lines represent the performance of active learning models, and the error bar is the standard deviation of testing results in five-fold training.

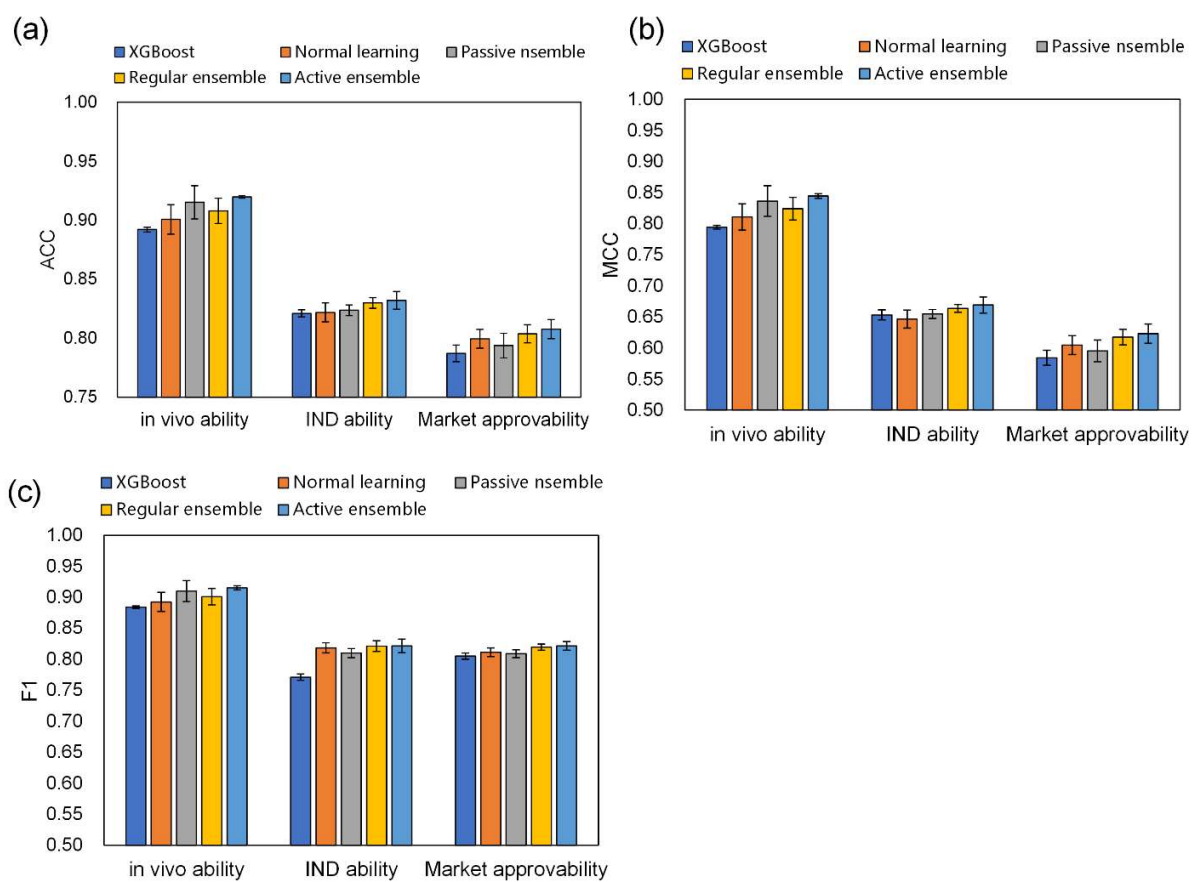

**Figure S6.** The performance of different methods on balanced test sets. (a) ACC (b) MCC (c) F1



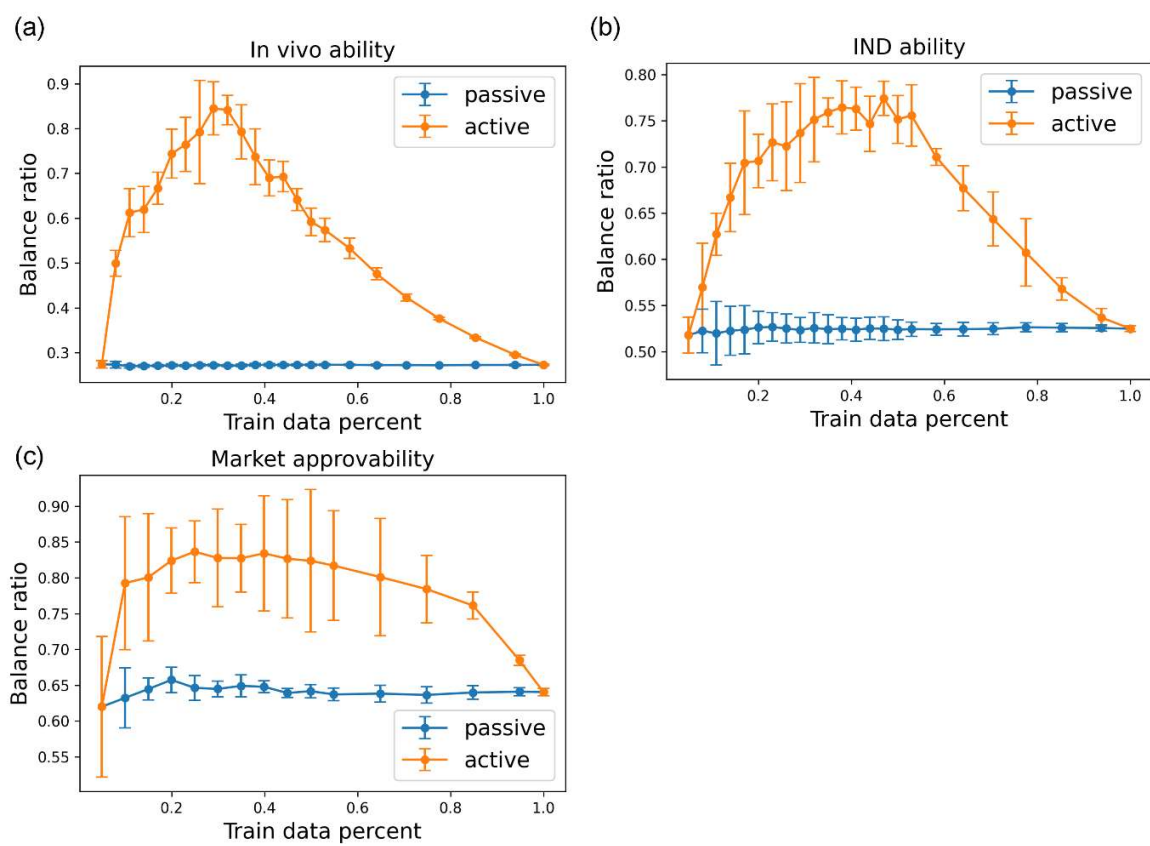

**Figure S7.** The balance ratio of training set in the active learning iterations. (a) *in vivo* ability model (b) IND ability model (c) Market approvability model

**Table S1.** Detailed information of DEKOIS2.0

| Targets    | Positive samples (positive samples after removing duplicates) | Negative samples (negative samples after removing duplicates) |
|------------|---------------------------------------------------------------|---------------------------------------------------------------|
| 11betaHSD1 | 40(39)                                                        | 1200(1194)                                                    |
| 17betaHSD1 | 40(23)                                                        | 1199(1188)                                                    |
| A2A        | 40(36)                                                        | 1200(1196)                                                    |
| ACE2       | 40(40)                                                        | 1198(1197)                                                    |
| ACE        | 40(40)                                                        | 1199(1197)                                                    |
| ACHE       | 40(40)                                                        | 1196(1193)                                                    |
| ADAM17     | 40(33)                                                        | 1200(1194)                                                    |
| ADRB2      | 40(40)                                                        | 1200(1193)                                                    |

|         |        |            |
|---------|--------|------------|
| AKT1    | 40(40) | 1198(1197) |
| ALR2    | 40(35) | 1199(1184) |
| AR      | 40(28) | 1200(1194) |
| AURKA   | 40(33) | 1200(1193) |
| AURKB   | 40(35) | 1200(1192) |
| BCL2    | 40(40) | 1199(1187) |
| BRAF    | 40(39) | 1199(1192) |
| CATL    | 40(40) | 1199(1195) |
| CDK2    | 40(36) | 1200(1191) |
| COX1    | 40(37) | 1197(1191) |
| COX2    | 40(40) | 1199(1191) |
| CTSK    | 40(40) | 1199(1188) |
| CYP2A6  | 40(37) | 1198(1187) |
| DHFR    | 40(37) | 1199(1191) |
| EGFR    | 40(35) | 1200(1187) |
| EPHB4   | 40(36) | 1200(1191) |
| ER-beta | 40(36) | 1200(1192) |
| ERBB2   | 40(37) | 1196(1192) |
| FGFR1   | 40(33) | 1198(1179) |
| FKBP1A  | 40(38) | 1200(1196) |
| FXA     | 40(40) | 1199(1190) |
| GBA     | 40(39) | 1199(1195) |
| GR      | 40(36) | 1199(1195) |
| GSK3B   | 40(37) | 1200(1196) |
| HDAC2   | 40(34) | 1200(1194) |
| HDAC8   | 40(30) | 1199(1196) |
| HIV1PR  | 40(38) | 1198(1188) |
| HIV1RT  | 40(38) | 1200(1194) |
| HMGR    | 40(40) | 1200(1191) |
| HSP90   | 40(31) | 1200(1195) |
| IGF1R   | 40(38) | 1198(1196) |
| INHA    | 40(27) | 1200(1197) |
| ITK     | 40(39) | 1200(1197) |
| JAK3    | 40(35) | 1199(1196) |
| JNK1    | 40(35) | 1200(1192) |
| JNK2    | 40(35) | 1199(1192) |
| JNK3    | 40(30) | 1200(1189) |
| KIF11   | 40(39) | 1198(1196) |
| LCK     | 40(37) | 1200(1194) |
| MDM2    | 40(40) | 1196(1189) |
| MK2     | 40(38) | 1198(1190) |
| MMP2    | 40(37) | 1200(1193) |
| NA      | 40(40) | 1191(1187) |

|           |        |            |
|-----------|--------|------------|
| P38-alpha | 40(38) | 1200(1193) |
| PARP-1    | 40(35) | 1200(1193) |
| PDE4B     | 40(38) | 1200(1197) |
| PDE5      | 40(40) | 1200(1196) |
| PDK1      | 40(36) | 1200(1198) |
| PI3Kg     | 40(36) | 1200(1197) |
| PIM-1     | 40(36) | 1199(1196) |
| PIM-2     | 40(39) | 1200(1197) |
| PNP       | 40(40) | 1198(1194) |
| PPARA     | 40(39) | 1200(1199) |
| PPARG     | 40(39) | 1197(1191) |
| PRKCQ     | 40(38) | 1200(1198) |
| PR        | 40(38) | 1199(1191) |
| PYGL-in   | 40(39) | 1200(1199) |
| PYGL-out  | 40(40) | 1199(1193) |
| QPCT      | 40(40) | 1197(1195) |
| ROCK-1    | 40(38) | 1198(1191) |
| RXR       | 40(40) | 1197(1189) |
| SARS-HCoV | 39(38) | 1170(1159) |
| SIRT2     | 40(38) | 1199(1190) |
| SRC       | 40(38) | 1200(1196) |
| TIE2      | 40(35) | 1199(1196) |
| TK        | 40(35) | 1200(1195) |
| TPA       | 40(39) | 1199(1198) |
| TP        | 40(32) | 1197(1189) |
| TS        | 40(40) | 1199(1194) |
| Thrombin  | 40(39) | 1198(1197) |
| VEGFR1    | 40(35) | 1200(1196) |
| VEGFR2    | 40(38) | 1200(1195) |
| uPA       | 40(35) | 1199(1193) |

**Table S2.** The detailed information balance test data

| Task                   | Positive or negative in datasets    | Compound number |
|------------------------|-------------------------------------|-----------------|
| <i>In vivo</i> ability | Compounds in vivo testing stage (+) | 2821            |
|                        | Other compounds (-)                 | 2821            |
| IND ability            | Compounds in clinical trials (+)    | 944             |
|                        | Compounds in vivo testing stage (-) | 944             |
| Market approvability   | Approved drugs (+)                  | 381             |
|                        | Compounds in clinical trials (-)    | 381             |

**Table S3.** The performance of different strategies on ChEMBL data

| Target | Learning Method  | ACC          | MCC          | F1           |
|--------|------------------|--------------|--------------|--------------|
| BRAF   | Normal learning  | 0.956        | 0.535        | 0.977        |
|        | Passive ensemble | 0.960        | 0.538        | 0.979        |
|        | Normal ensemble  | 0.960        | 0.557        | 0.979        |
|        | Active ensemble  | <b>0.962</b> | <b>0.576</b> | <b>0.980</b> |
| DPP4   | Normal learning  | 0.902        | 0.724        | 0.936        |
|        | Passive ensemble | 0.912        | 0.744        | 0.944        |
|        | Normal ensemble  | 0.916        | 0.756        | 0.946        |
|        | Active ensemble  | <b>0.917</b> | <b>0.762</b> | <b>0.946</b> |
| LCK    | Normal learning  | 0.945        | 0.759        | 0.969        |
|        | Passive ensemble | 0.948        | 0.774        | 0.971        |
|        | Normal ensemble  | 0.949        | 0.779        | 0.971        |
|        | Active ensemble  | <b>0.950</b> | <b>0.784</b> | <b>0.972</b> |
| EGFR   | Normal learning  | 0.933        | 0.512        | 0.964        |
|        | Passive ensemble | 0.937        | 0.530        | 0.967        |
|        | Normal ensemble  | 0.938        | 0.536        | 0.967        |
|        | Active ensemble  | <b>0.939</b> | <b>0.553</b> | <b>0.967</b> |

The bold numbers represent the best results.

**Table S4.** The detailed information of investigational compounds and drugs from ChEMBL after removing duplicates and preprocessing

| Investigational compounds | Drugs | All  |
|---------------------------|-------|------|
| 1310                      | 492   | 1802 |

**Table S5.** The performance of market approvability model on ChEMBL data

| ACC   | MCC   | F1    |
|-------|-------|-------|
| 0.728 | 0.383 | 0.569 |

**Table S6.** The virtual screening performance of *in vivo* ability model on DEKOIS 2.0

| Target     | AUC   | EF1% | EF2% | EF5% | EF10% |
|------------|-------|------|------|------|-------|
| 11betaHSD1 | 0.743 | 2.6  | 3.8  | 2.6  | 3.1   |
| 17betaHSD1 | 0.912 | 39.1 | 28.3 | 13.9 | 7.8   |
| A2A        | 0.796 | 5.6  | 5.6  | 7.2  | 5.3   |
| ACE2       | 0.992 | 22.5 | 26.3 | 19.0 | 9.8   |
| ACE        | 0.948 | 2.5  | 3.8  | 8.0  | 7.8   |
| ACHE       | 0.763 | 0.0  | 1.3  | 2.0  | 3.0   |
| ADAM17     | 0.957 | 27.3 | 24.2 | 14.5 | 8.2   |
| ADRB2      | 0.900 | 10.0 | 6.3  | 7.0  | 5.5   |
| AKT1       | 0.894 | 5.0  | 7.5  | 7.5  | 6.0   |
| ALR2       | 0.883 | 2.9  | 4.3  | 6.9  | 6.0   |
| AR         | 0.812 | 7.1  | 8.9  | 6.4  | 4.6   |
| AURKA      | 0.875 | 18.2 | 13.6 | 7.3  | 5.8   |
| AURKB      | 0.912 | 14.3 | 12.9 | 9.1  | 6.3   |
| BCL2       | 0.681 | 0.0  | 0.0  | 1.0  | 1.3   |
| BRAF       | 0.966 | 12.8 | 11.5 | 12.3 | 9.0   |
| CATL       | 0.740 | 2.5  | 2.5  | 2.5  | 2.5   |
| CDK2       | 0.849 | 11.1 | 8.3  | 6.1  | 5.6   |
| COX1       | 0.861 | 8.1  | 5.4  | 4.9  | 4.6   |
| COX2       | 0.962 | 20.0 | 15.0 | 13.0 | 8.8   |
| CTSK       | 0.608 | 0.0  | 0.0  | 1.0  | 2.0   |
| CYP2A6     | 0.692 | 5.4  | 8.1  | 3.8  | 2.7   |
| DHFR       | 0.849 | 2.7  | 5.4  | 7.6  | 5.7   |
| EGFR       | 0.900 | 14.3 | 11.4 | 9.7  | 6.6   |
| EPHB4      | 0.914 | 8.3  | 11.1 | 10.6 | 7.5   |
| ER-beta    | 0.928 | 11.1 | 12.5 | 10.0 | 7.2   |
| ERBB2      | 0.935 | 5.4  | 10.8 | 10.8 | 7.0   |
| FGFR1      | 0.923 | 3.0  | 9.1  | 7.3  | 6.7   |
| FKBP1A     | 0.949 | 5.3  | 11.8 | 10.0 | 8.4   |
| FXA        | 0.860 | 5.0  | 6.3  | 4.0  | 4.5   |
| GBA        | 0.688 | 15.4 | 9.0  | 3.6  | 2.1   |
| GR         | 0.956 | 8.3  | 6.9  | 7.8  | 9.2   |
| GSK3B      | 0.841 | 10.8 | 9.5  | 7.6  | 4.9   |
| HDAC2      | 0.939 | 14.7 | 13.2 | 11.8 | 8.2   |
| HDAC8      | 0.980 | 26.7 | 20.0 | 15.3 | 10.0  |
| HIV1PR     | 0.912 | 10.5 | 7.9  | 6.8  | 5.8   |
| HIV1RT     | 0.809 | 5.3  | 3.9  | 4.7  | 3.7   |
| HMGR       | 0.927 | 2.5  | 5.0  | 5.5  | 7.3   |

|           |       |      |      |      |     |
|-----------|-------|------|------|------|-----|
| HSP90     | 0.904 | 0.0  | 4.8  | 6.5  | 5.8 |
| IGF1R     | 0.955 | 10.5 | 17.1 | 11.1 | 7.9 |
| INHA      | 0.527 | 7.4  | 5.6  | 2.2  | 1.5 |
| ITK       | 0.830 | 10.3 | 6.4  | 3.6  | 3.6 |
| JAK3      | 0.919 | 5.7  | 8.6  | 9.1  | 7.4 |
| JNK1      | 0.827 | 11.4 | 11.4 | 9.1  | 5.7 |
| JNK2      | 0.861 | 8.6  | 8.6  | 7.4  | 5.7 |
| JNK3      | 0.875 | 6.7  | 11.7 | 9.3  | 6.7 |
| KIF11     | 0.604 | 0.0  | 0.0  | 0.0  | 0.8 |
| LCK       | 0.944 | 16.2 | 12.2 | 11.4 | 7.0 |
| MDM2      | 0.888 | 0.0  | 3.8  | 5.5  | 5.3 |
| MK2       | 0.930 | 15.8 | 13.2 | 7.4  | 5.8 |
| MMP2      | 0.921 | 18.9 | 16.2 | 12.4 | 7.8 |
| NA        | 0.827 | 0.0  | 0.0  | 0.0  | 2.3 |
| P38-alpha | 0.926 | 7.9  | 7.9  | 6.8  | 6.3 |
| PARP-1    | 0.842 | 5.7  | 8.6  | 6.3  | 5.4 |
| PDE4B     | 0.902 | 21.1 | 17.1 | 8.4  | 7.1 |
| PDE5      | 0.915 | 5.0  | 6.3  | 9.0  | 7.0 |
| PDK1      | 0.973 | 13.9 | 16.7 | 13.3 | 9.4 |
| PI3Kg     | 0.836 | 5.6  | 5.6  | 5.0  | 4.4 |
| PIM-1     | 0.853 | 8.3  | 9.7  | 6.1  | 4.4 |
| PIM-2     | 0.890 | 12.8 | 9.0  | 7.2  | 6.2 |
| PNP       | 0.915 | 10.0 | 7.5  | 6.5  | 5.5 |
| PPARA     | 0.926 | 10.3 | 11.5 | 10.3 | 8.5 |
| PPARG     | 0.914 | 15.4 | 12.8 | 9.2  | 6.7 |
| PRKCQ     | 0.936 | 18.4 | 17.1 | 11.1 | 7.6 |
| PR        | 0.919 | 15.8 | 14.5 | 10.0 | 6.3 |
| PYGL-in   | 0.848 | 5.1  | 5.1  | 6.7  | 3.8 |
| PYGL-out  | 0.873 | 0.0  | 3.8  | 3.5  | 3.0 |
| QPCT      | 0.659 | 0.0  | 1.3  | 1.5  | 1.5 |
| ROCK-1    | 0.812 | 10.5 | 10.5 | 5.8  | 4.7 |
| RXR       | 0.980 | 27.5 | 22.5 | 14.5 | 9.0 |
| SARS-HCoV | 0.465 | 0.0  | 0.0  | 0.5  | 1.1 |
| SIRT2     | 0.756 | 5.3  | 5.3  | 3.2  | 2.1 |
| SRC       | 0.872 | 15.8 | 11.8 | 8.9  | 6.6 |
| TIE2      | 0.927 | 14.3 | 14.3 | 12.0 | 7.7 |
| TK        | 0.809 | 2.9  | 4.3  | 5.7  | 3.7 |
| TPA       | 0.898 | 5.1  | 5.1  | 7.7  | 5.9 |
| TP        | 0.852 | 0.0  | 0.0  | 1.9  | 2.8 |
| TS        | 0.890 | 0.0  | 6.3  | 5.0  | 5.8 |
| Thrombin  | 0.819 | 0.0  | 3.8  | 5.6  | 4.1 |
| VEGFR1    | 0.872 | 17.1 | 12.9 | 8.6  | 5.4 |
| VEGFR2    | 0.895 | 10.5 | 11.8 | 8.9  | 6.8 |

|               |              |            |            |            |            |
|---------------|--------------|------------|------------|------------|------------|
| uPA           | 0.853        | 5.7        | 7.1        | 6.9        | 5.4        |
| <b>mean</b>   | <b>0.860</b> | <b>9.2</b> | <b>9.1</b> | <b>7.4</b> | <b>5.6</b> |
| <b>median</b> | <b>0.890</b> | <b>8.1</b> | <b>8.6</b> | <b>7.3</b> | <b>5.8</b> |

**Table S7** The detailed information of bioactivity data

|         | Training |          | Test   |          |
|---------|----------|----------|--------|----------|
| Targets | Active   | Inactive | Active | Inactive |
| BRAF    | 1880     | 73       | 206    | 10       |
| DPP4    | 1182     | 378      | 135    | 38       |
| LCK     | 1519     | 183      | 162    | 27       |
| EGFR    | 5924     | 529      | 655    | 62       |
